# Supplementary material
Source: Research Square preprint supplement (doi:10.21203/rs.3.rs-8882376/v1)
Supplement: Supplementary file 1 [file b3fbca093765a96eef03200b.xlsx]

## Sheet: Success_of_treatment
Title	Authors	n_ctrl	events_ctrl	n_interv	events_interv
A clinical evaluation of efficacy and safety of cefepime monotherapy versus piperacillin-tazobactam in patients of paediatric age group with febrile neutropenia in a tertiary care centre of north India	Aamir et al. (2015)	20	16	20	15
Monotherapy with piperacillin/tazobactam versus cefepime as empirical therapy for febrile neutropenia in pediatric cancer patients: A randomized comparison	Corapcioglu et al. (2006)	25	12	25	14
Comparison Between Piperacillin/Tazobactam and Cefepime Monotherapies as an Empirical Therapy for Febrile Neutropenia in Children With Hematological and Malignant Disorders: A Prospective, Randomized Study	Sano et al. (2014)	110	65	103	64
Piperacillin/Tazobactam Versus Cefepime for the Empirical Treatment of Pediatric Cancer Patients With Neutropenia and Fever: A Randomized and Open-Label Study	Uygun et al. (2009)	62	38	65	39
Piperacillin-tazobactam versus Cefepime monotherapy for pediatric febrile neutropenia	Kebudi et al. (2005)	20	11	20	9

## Sheet: Mortality
Title	Authors	n_ctrl	events_ctrl	n_interv	events_interv
A clinical evaluation of efficacy and safety of cefepime monotherapy versus piperacillin-tazobactam in patients of paediatric age group with febrile neutropenia in a tertiary care centre of north India	Aamir et al. (2015)	20	2	20	4
Monotherapy with piperacillin/tazobactam versus cefepime as empirical therapy for febrile neutropenia in pediatric cancer patients: A randomized comparison	Corapcioglu et al. (2006)	25	0	25	0
Comparison Between Piperacillin/Tazobactam and Cefepime Monotherapies as an Empirical Therapy for Febrile Neutropenia in Children With Hematological and Malignant Disorders: A Prospective, Randomized Study	Sano et al. (2014)	110	0	103	1
Piperacillin/Tazobactam Versus Cefepime for the Empirical Treatment of Pediatric Cancer Patients With Neutropenia and Fever: A Randomized and Open-Label Study	Uygun et al. (2009)	62	1	65	2
Piperacillin-tazobactam versus Cefepime monotherapy for pediatric febrile neutropenia	Kebudi et al. (2005)	20	0	20	0

## Sheet: Duration_of_treatment
Title	Authors	n_ctrl	mean_ctrl	sd_ctrl	n_interv	mean_interv	sd_interv
Monotherapy with piperacillin/tazobactam versus cefepime as empirical therapy for febrile neutropenia in pediatric cancer patients: A randomized comparison	Corapcioglu et al. (2006)	25	11.8	7.7	25	10.8	4.9
Comparison Between Piperacillin/Tazobactam and Cefepime Monotherapies as an Empirical Therapy for Febrile Neutropenia in Children With Hematological and Malignant Disorders: A Prospective, Randomized Study	Sano et al. (2014)	110	9.0527	2.1721	103	10	3.1885
Piperacillin/Tazobactam Versus Cefepime for the Empirical Treatment of Pediatric Cancer Patients With Neutropenia and Fever: A Randomized and Open-Label Study	Uygun et al. (2009)	62	12.7957	11.1835	65	14.198	11.7398
